# Supplementary material for: Physiological Effects of l-Theanine on Drosophila melanogaster
Source: MDPI journal article supplement (doi:10.3390/molecules181113175), 2013-10-24

# Supplementary Materials

**Figure S1.** Effect of theanine on lifespan of males (A) and females (B); heat tolerance of males (C) and females (D); anoxia resistance of males (E) and females (F); and body weight of males (G) and females (H).

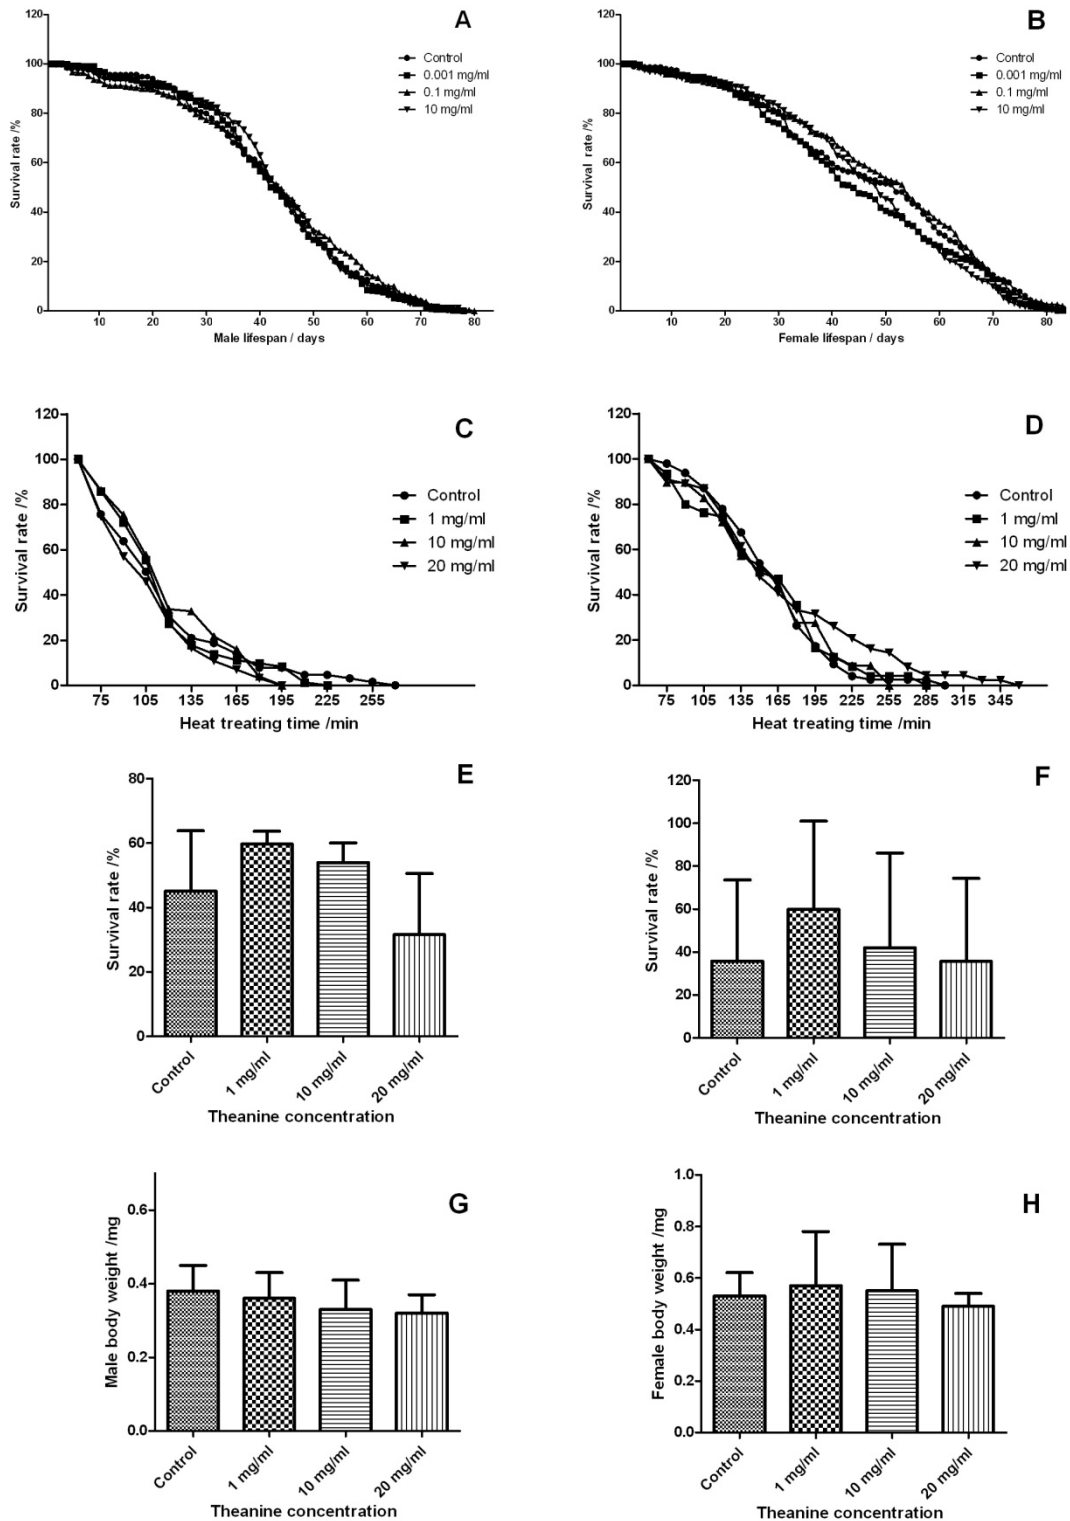

**Figure S2.** Theanine has no significant effect on climbing ability (A), resistance against wet (B) and dry (C) starvation in females.  $p > 0.05$  versus control, t-test.

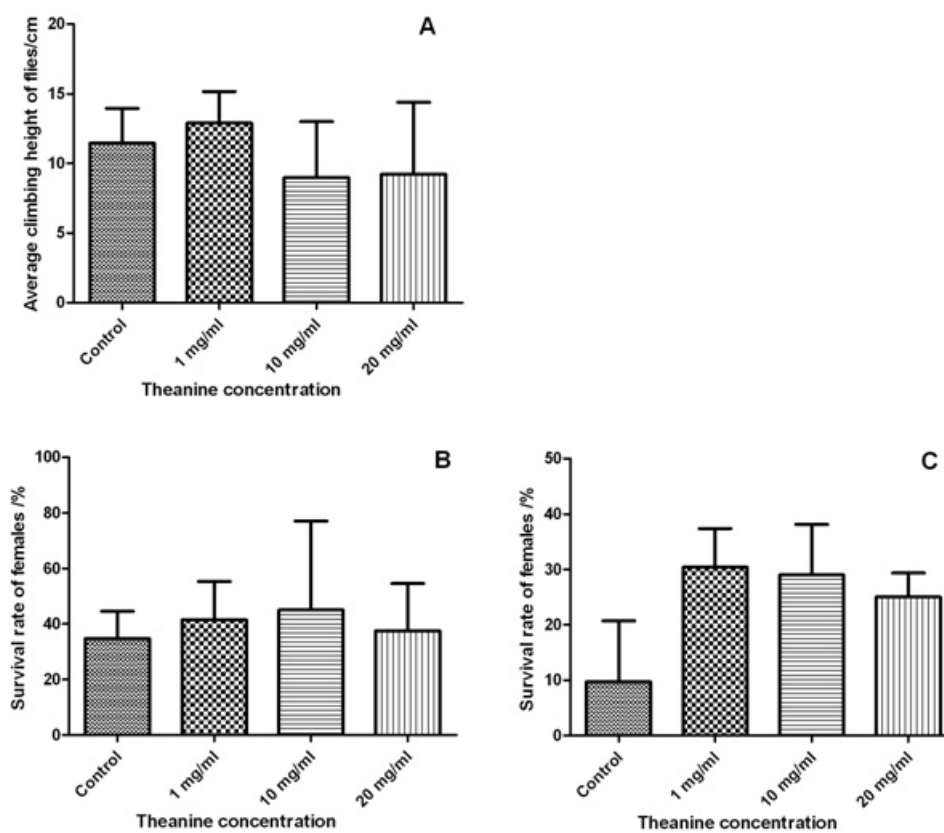

Supplement: s1 [file s1]
